# Supplementary material for: Transcriptome analysis of creeping bentgrass exposed to drought stress and polyamine treatment
Source: PubMed Central journal article supplement (PMC5406032; doi:10.1371/journal.pone.0175848), 2017-04-26
Supplement: pone.0175848.s004.pdf [file pone.0175848.s004.pdf]

**Transcriptome Analysis of Creeping Bentgrass Exposed to Drought Stress and Polyamine  
Treatment**

Yingmei Ma, Vijaya Shukla, and Emily B. Merewitz
